# Supplementary material for: STAT3-induced lncRNA HAGLROS overexpression contributes to the malignant progression of gastric cancer cells via mTOR signal-mediated inhibition of autophagy
Source: Mol Cancer. 2018 Jan 12;17:6. doi: 10.1186/s12943-017-0756-y (PMC5767073; doi:10.1186/s12943-017-0756-y)
Supplement: Supplementary file 2 — Primers used for qRT-PCR,RT-PCR, CHIP and siRNAs/shRNA oligonucleotides. (XLSX 12 kb) [file 12943_2017_756_MOESM2_ESM.xlsx]

## Sheet: 工作表1
Table S2. Primers used for qRT-PCR,RT-PCR, CHIP and siRNAs/shRNA oligonucleotides
Primers used for qRT-PCR
	HAGLROS-F	TGTCACCCTTAAATACCGCTCT
	HAGLROS-R	CTTCCTCCCACACAAATACTCC
	STAT3-F	CAACAGATTGCCTGCATTGGA
	STAT3-R	ATTTGTTGACGGGTCTGAAGTTGA
	mTOR-F	CCTGTTTCCACTGGTCCACTA
	mTOR-R	CCTGTTTCCACTGGTCCACTA
	ATG9A-F	CATTTCTCTCGGCTGCCTCT
	ATG9A-R	GGTGGGGCATATCTTCCTTCC
	ATG9B-F	AGGGGCCTTCCAGATTAAGG
	ATG9B-R	CGAGTCGGGTTCTGATCCAC
	PRAS40-F	GGATGCTGCTTTCCACCCAT
	PRAS40-R	AACAGGGGTTGCTACAAGGG
	Raptor-F	CTGGAGGATGAAGGATCGGG
	Raptor-F	GGCTAGGGGGAAATGTCGG
	PRCC-F	ACCTGGAGTTGAGCCATACC
	PRCC-R	ACTTGAACCTGCTGCCATCT
	DUSP-F	TGTTGACCTTGACCAAATGC
	DUSP-R	GGCGAATGCAGAGCTAAGTC
	CSNK2A2-F	CAGCACGATGAAGACTGGAA
	CSNK2A2-R	CCTTCGCTTGGTCTAGTTCG
	FOXC2-F	TTGACGAAGCACTCGTTGAG
	FOXC2-R	CACAGTCCACAGAAGCGTGT
	GFOD1-F	CCTATGAGGAAGCCCAATCA
	GFOD1-R	CATGGGCGAGAAGTGTGTC
	U6-F	CTCGCTTCGGCAGCACA
	U6-R	AACGCTTCACGAATTTGCGT
	GAPDH-F	AGCCACATCGCTCAGACAC
	GAPDH-R	GCCCAATACGACCAAATCC
siRNAs/shRNA oligonucleotides
	Ctrl siRNA	UUCUCCGAACGUGUCACGUdTdT
	HAGLROS siRNA-1	CCUAUUUACUGGCAGGAGUTT
	HAGLROS siRNA-2	GGCUAAGACUGCUGUUGAATT
	STAT3 siRNA-1	AAUCGGGUACACUAGACUGUGGGAC
	STAT3 siRNA-2	GGUACAUCAUGGGCUUUAUTT
	Ctrl shRNA	GATCCCCTTCTCCGAACGTGTCACGTTTCAAGAGAACGTGACACGTTCGGAGAATTTTTGGAAA
	HAGLROS shRNA-1	CACCGCCTATTTACTGGCAGGAGTTTCTCGAGCTATTCCTTCAGCCAGTACCC
	HAGLROS shRNA-2	CACCGGCTAAGACTGCTGTTGAATTCTCGAGCAAAGAAGGCTAGGTGCTCTC
CHIP primers of the HAGLROS promoter for STAT3 occupancy
	E1 region-F	CAGAATGGCCAGCTGCAAAA
	E1 region-R	TCAGCACTTCAACTCCTGGC
	E2 region-F	TAGTTTCCGAGGCTCACAGG
	E2 region-R	GGGCTGGTACAGACTAGGGA
